# Supplementary material for: Machine Learning to Identify Patients at Risk of Developing New-Onset Atrial Fibrillation after Coronary Artery Bypass
Source: MDPI journal article supplement (doi:10.3390/jcdd10020082), 2023-02-15
Supplement: s1 [file s1]

| Table S1. Training dataset descriptive characteristics. |                    |                    |                   |       |
|---------------------------------------------------------|--------------------|--------------------|-------------------|-------|
|                                                         | Overall<br>(n=296) | No POAF<br>(n=264) | POAF<br>(n=32)    | p     |
| <b>Female/Male</b>                                      | 48/248 (16.2/83.8) | 41/223 (15.5/84.5) | 7/25 (21.9/78.1)  | 0.506 |
| <b>Age</b>                                              | 0.50 [0.37, 0.61]  | 0.48 [0.36, 0.61]  | 0.54 [0.46, 0.66] | 0.006 |
| <b>BSA (m<sup>2</sup>)</b>                              | 0.53 [0.40, 0.64]  | 0.52 [0.40, 0.64]  | 0.55 [0.42, 0.65] | 0.553 |
| <b>Hypertension</b>                                     | 198 (67)           | 177 (67)           | 21 (66)           | 0.845 |
| <b>Type II DM</b>                                       | 125 (42)           | 111 (42)           | 14 (44)           | 0.852 |
| <b>Hyperlipidemia</b>                                   | 146 (49)           | 132 (50)           | 14 (44)           | 0.576 |
| <b>COPD</b>                                             | 29 (10)            | 26 (10)            | 3 (9)             | 1     |
| <b>CKD</b>                                              | 68 (23)            | 61 (23)            | 7 (22)            | 1     |
| <b>TIA/Stroke</b>                                       | 12 (4)             | 10 (4)             | 2 (6)             | 0.626 |
| <b>PVD</b>                                              | 42 (14)            | 38 (14)            | 4 (12)            | 1     |
| <b>Year</b>                                             |                    |                    |                   |       |
| <b>2010</b>                                             | 9 ( 3.0)           | 8 ( 3.0)           | 1 ( 3.1)          | 1     |
| <b>2011</b>                                             | 6 ( 2.0)           | 6 ( 2.3)           | 0 ( 0.0)          | 0.843 |
| <b>2012</b>                                             | 13 ( 4.4)          | 11 ( 4.2)          | 2 ( 6.2)          | 0.931 |
| <b>2013</b>                                             | 49 (16.6)          | 48 ( 18.2)         | 1 ( 3.1)          | 0.056 |
| <b>2014</b>                                             | 78 (26.4)          | 69 ( 26.1)         | 9 (28.1)          | 0.977 |
| <b>2015</b>                                             | 52 (17.6)          | 43 ( 16.3)         | 9 (28.1)          | 0.157 |
| <b>2016</b>                                             | 57 (19.3)          | 51 ( 19.3)         | 6 (18.8)          | 1     |
| <b>2017</b>                                             | 32 (10.8)          | 28 ( 10.6)         | 4 (12.5)          | 0.981 |
| <b>Pre-operative Creatinine*</b>                        | 0.19 [0.15, 0.23]  | 0.19 [0.15, 0.23]  | 0.21 [0.16, 0.24] | 0.361 |
| <b>EuroScore (Log)</b>                                  | 0.02 [0.01, 0.05]  | 0.02 [0.00, 0.05]  | 0.02 [0.01, 0.07] | 0.17  |
| <b>Status</b>                                           |                    |                    |                   |       |
| <b>Elective</b>                                         | 116 (39.2)         | 102 ( 38.6)        | 14 (43.8)         | 0.713 |
| <b>Emergency</b>                                        | 10 ( 3.4)          | 8 ( 3.0)           | 2 ( 6.2)          | 0.664 |
| <b>Urgency</b>                                          | 170 (57.4)         | 154 ( 58.3)        | 16 (50.0)         | 0.477 |
| <b>OR Risk</b>                                          |                    |                    |                   |       |
| <b>high</b>                                             | 28 ( 9.5)          | 21 ( 8.0)          | 7 (21.9)          | 0.026 |
| <b>low</b>                                              | 230 (77.7)         | 209 ( 79.2)        | 21 (65.6)         | 0.13  |
| <b>medium</b>                                           | 38 (12.8)          | 34 ( 12.9)         | 4 (12.5)          | 1     |
| <b>CABG</b>                                             | 281 (94.9)         | 251 ( 95.1)        | 30 (93.8)         | 1     |
| <b>OPCAB</b>                                            | 15 ( 5.1)          | 13 (4.9)           | 2 (6.2)           | 1     |
| <b>Proximal Anastomoses</b>                             |                    |                    |                   | 0.777 |
| <b>1</b>                                                | 57 (19.3)          | 50 (18.9)          | 7 (21.9)          |       |
| <b>2</b>                                                | 13 (4.4)           | 11 (4.2)           | 2 (6.2)           |       |
| <b>Distal Anastomoses</b>                               |                    |                    |                   | 0.29  |
| <b>2</b>                                                | 65 (22.0)          | 55 (20.8)          | 10 (31.2)         |       |
| <b>3</b>                                                | 134 (45.3)         | 118 (44.7)         | 16 (50.0)         |       |
| <b>4</b>                                                | 79 (26.7)          | 74 (28.0)          | 5 (15.6)          |       |
| <b>5</b>                                                | 18 (6.1)           | 17 (6.4)           | 1 (3.1)           |       |
| <b>ECC Time (min)</b>                                   | 0.37 [0.29, 0.45]  | 0.37 [0.29, 0.45]  | 0.34 [0.28, 0.40] | 0.4   |
| <b>Clamping Time</b>                                    | 0.44 [0.31, 0.55]  | 0.44 [0.31, 0.56]  | 0.41 [0.36, 0.48] | 0.498 |
| <b>Complications</b>                                    |                    |                    |                   | 0.685 |
| <b>1</b>                                                | 28 (9.5)           | 26 (9.8)           | 2 (6.2)           |       |
| <b>2</b>                                                | 4 (1.4)            | 3 (1.1)            | 1 (3.1)           |       |
| <b>3</b>                                                | 2 (0.7)            | 2 (0.8)            | 0 (0.0)           |       |
| <b>EC</b>                                               | -                  | -                  | 1 (3.1)           |       |

|                |   |   |           |
|----------------|---|---|-----------|
| <b>FC</b>      | - | - | 9 (28.1)  |
| <b>EC + FC</b> | - | - | 21 (65.6) |

---

Values are expressed as n (%) with categorical variables or median [Q1, Q3] with continuous variables. Abbreviations: POAF: Postoperative Atrial Fibrillation; BSA: Body Surface Area; DM: Diabetes Mellitus; COPD: Chronic Obstructive Pulmonary Disease; CKD: Chronic Kidney Disease; TIA: Transient Ischemic Attack; PVD: Peripheral Vascular Disease; CABG: Coronary Artery Bypass Graft; OPCAB: Off-Pump Coronary Artery Bypass; BIMA: Bilateral Internal Mammary Artery; OR: Operative Risk Score; ECC: Extra Corporeal Circulation; EC: Electric Cardioversion; FC: Pharmacological Cardioversion. \*Micromoles/L.

| Table S2. Test dataset descriptive characteristics. |                   |                   |                   |       |
|-----------------------------------------------------|-------------------|-------------------|-------------------|-------|
|                                                     | Overall           | No POAF           | POAF              | p     |
|                                                     | (n=98)            | (n=88)            | (n=10)            |       |
| Female/Male                                         | 12/86 (12.2/87.8) | 12/76 (13.6/86.4) | 0/10 (0.0/100.0)  | 0.461 |
| Age                                                 | 0.46 [0.38, 0.57] | 0.45 [0.36, 0.57] | 0.61 [0.52, 0.62] | 0.008 |
| BSA (m <sup>2</sup> )                               | 0.52 [0.42, 0.64] | 0.51 [0.41, 0.64] | 0.54 [0.51, 0.64] | 0.694 |
| Hypertension                                        | 67 (68)           | 60 (68)           | 7 (70)            | 1     |
| Type II DM                                          | 41 (42)           | 37 (42)           | 4 (40)            | 1     |
| Hyperlipidemia                                      | 50 (51)           | 45 (51)           | 5 (50)            | 1     |
| COPD                                                | 9 (9)             | 8 (9)             | 1 (10)            | 1     |
| CKD                                                 | 20 (20)           | 18 (20)           | 2 (20)            | 1     |
| TIA/Stroke                                          | 10 (10)           | 9 (10)            | 1 (10)            | 1     |
| PVD                                                 | 12 (12)           | 11 (12)           | 1 (10)            | 1     |
| Year                                                |                   |                   |                   |       |
| 2010                                                | 1 ( 1.0)          | 1 ( 1.1)          | 0 ( 0.0)          | 1     |
| 2011                                                | 2 ( 2.0)          | 2 ( 2.3)          | 0 ( 0.0)          | 1     |
| 2012                                                | 9 ( 9.2)          | 9 ( 10.2)         | 0 ( 0.0)          | 0.629 |
| 2013                                                | 18 (18.4)         | 18 ( 20.5)        | 0 ( 0.0)          | 0.249 |
| 2014                                                | 21 (21.4)         | 18 ( 20.5)        | 3 ( 30.0)         | 0.771 |
| 2015                                                | 20 (20.4)         | 16 ( 18.2)        | 4 ( 40.0)         | 0.227 |
| 2016                                                | 19 (19.4)         | 16 ( 18.2)        | 3 ( 30.0)         | 0.636 |
| 2017                                                | 8 ( 8.2)          | 8 ( 9.1)          | 0 ( 0.0)          | 0.7   |
| Pre-operative Creatinine*                           | 0.20 [0.16, 0.24] | 0.20 [0.16, 0.24] | 0.21 [0.18, 0.25] | 0.391 |
| EuroScore (Log)                                     | 0.02 [0.01, 0.05] | 0.02 [0.01, 0.05] | 0.02 [0.02, 0.04] | 0.337 |
| Status                                              |                   |                   |                   |       |
| Elective                                            | 35 (35.7)         | 32 ( 36.4)        | 3 ( 30.0)         | 0.96  |
| Emergency                                           | 4 ( 4.1)          | 3 ( 3.4)          | 1 ( 10.0)         | 0.877 |
| Urgency                                             | 59 (60.2)         | 53 ( 60.2)        | 6 ( 60.0)         | 1     |
| OR Risk                                             |                   |                   |                   |       |
| high                                                | 8 ( 8.2)          | 6 ( 6.8)          | 2 ( 20.0)         | 0.405 |
| low                                                 | 78 (79.6)         | 70 ( 79.5)        | 8 ( 80.0)         | 1     |
| medium                                              | 12 (12.2)         | 12 ( 13.6)        | 0 ( 0.0)          | 0.461 |
| CABG                                                | 91 (92.9)         | 82 ( 93.2)        | 9 ( 90.0)         | 1     |
| OPCAB                                               | 7 ( 7.1)          | 6 ( 6.8)          | 1 ( 10.0)         | 1     |
| Proximal Anastomoses                                |                   |                   |                   | 0.49  |
| 1                                                   | 24 (24.5)         | 23 ( 26.1)        | 1 ( 10.0)         |       |
| 2                                                   | 1 ( 1.0)          | 1 ( 1.1)          | 0 ( 0.0)          |       |
| Distal Anastomoses                                  |                   |                   |                   | 0.322 |
| 2                                                   | 25 (25.5)         | 22 ( 25.0)        | 3 ( 30.0)         |       |
| 3                                                   | 44 (44.9)         | 40 ( 45.5)        | 4 ( 40.0)         |       |
| 4                                                   | 22 (22.4)         | 21 ( 23.9)        | 1 ( 10.0)         |       |
| 5                                                   | 7 ( 7.1)          | 5 ( 5.7)          | 2 ( 20.0)         |       |
| ECC Time (min)                                      | 0.34 [0.27, 0.45] | 0.34 [0.28, 0.46] | 0.34 [0.26, 0.36] | 0.522 |
| Clamping Time                                       | 0.40 [0.30, 0.56] | 0.39 [0.30, 0.56] | 0.44 [0.33, 0.50] | 0.869 |
| Complications                                       |                   |                   |                   | 0.636 |
| 1                                                   | 11 (11.2)         | 11 ( 12.5)        | 0 ( 0.0)          |       |
| 2                                                   | 1 ( 1.0)          | 1 ( 1.1)          | 0 ( 0.0)          |       |
| 3                                                   | 1 ( 1.0)          | 1 ( 1.1)          | 0 ( 0.0)          |       |
| EC                                                  | -                 | -                 | 1 (10.0)          |       |

|                |   |   |          |
|----------------|---|---|----------|
| <b>FC</b>      | - | - | 3 (30.0) |
| <b>EC + FC</b> | - | - | 6 (60.0) |

---

Values are expressed as n (%) with categorical variables or median [Q1, Q3] with continuous variables. Abbreviations: POAF: Postoperative Atrial Fibrillation; BSA: Body Surface Area; DM: Diabetes Mellitus; COPD: Chronic Obstructive Pulmonary Disease; CKD: Chronic Kidney Disease; TIA: Transient Ischemic Attack; PVD: Peripheral Vascular Disease; CABG: Coronary Artery Bypass Graft; OPCAB: Off-Pump Coronary Artery Bypass; BIMA: Bilateral Internal Mammary Artery; OR: Operative Risk Score; ECC: Extra Corporeal Circulation; EC: Electric Cardioversion; FC: Pharmacological Cardioversion. \*Micromoles/L.
